# Supplementary material for: Satisfaction survey on a preoperative explanation method using 3-dimensional breast imaging for breast cancer patients considering breast conserving surgery
Source: Research Square preprint supplement (doi:10.21203/rs.3.rs-1660260/v1), 2022-06-10
Supplement: Supplementary file 1 [file 04c2f81e717cced34ab2720c.xlsx]

## Sheet: Table 1
Age (years) (%)
<40	11（6.8）
40-49	56（34.6）
50-59	42（25.9）
60-69	29（17.9）
≧70	24（14.8）
BMI (kg/m2), mean	21.9
Smoking status (%)
Never	124（76.5）
Current	8（4.9）
Ex-smoker	29（17.9）
unknown	1（0.8）
Tumor location (%) *1
Upper-outer	98（59.8）
Upper-inner	31（18.9）
Lower-outer	15（9.1）
Lower-inner	11（6.7）
Central	9（5.5）
Tumor size including carcioma in situ (%) *１, *2
≦ 5mm	15（9.1）
>5mm, ≦10mm	37（22.6）
>10mm, ≦20mm	92（56.1）
>20mm	19（11.6）
Clinical nodal status (%) *1
Negative	156（95.1）
Positive	8（4.9）
Neoadjuvant Chemotherapy (%)
Yes	17（10.5）
No	145（89.5）
*1 two bilateral breast cancer patients
*2 tumor size after chemotherapy in neoadjuvant chemotherapy cases
